# Supplementary material
Source: PubMed Central journal article supplement (PMC6656579)
Supplement: EMS82705-supplement-Supplementary_information.pdf [file EMS82705-supplement-Supplementary_information.pdf]

# Quantitative imaging of electric surface potentials with single-atom sensitivity

Christian Wagner<sup>1,2\*</sup> Matthew. F. B. Green,<sup>1,2,3</sup> Michael Maiworm,<sup>4</sup> Philipp Leinen,<sup>1,2,3</sup> Taner Esat,<sup>1,2,3</sup>  
Nicola Ferri,<sup>5</sup> Niklas Friedrich,<sup>1,2,3</sup> Rolf Findeisen,<sup>4</sup> Alexandre Tkatchenko,<sup>5,6</sup>  
Ruslan Temirov,<sup>1,2,7</sup> F. Stefan Tautz,<sup>1,2,3</sup>

<sup>1</sup>Peter Grünberg Institut (PGI-3), Forschungszentrum Jülich, 52425 Jülich, Germany

<sup>2</sup>Jülich Aachen Research Alliance (JARA)-Fundamentals of Future Information Technology,  
52425 Jülich, Germany

<sup>3</sup>Experimentalphysik IV A, RWTH Aachen University, Otto-Blumenthal-Straße, 52074 Aachen, Germany

<sup>4</sup>Otto-von-Guericke-Universität Magdeburg, Laboratory for Systems Theory and Automatic Control, Magdeburg, Germany

<sup>5</sup>Fritz-Haber-Institut der Max-Planck-Gesellschaft, Faradayweg 4-6, 14195, Berlin, Germany

<sup>6</sup>Physics and Materials Science Research Unit, University of Luxembourg, 1511 Luxembourg, Luxembourg

<sup>7</sup>II. Physikalisches Institut, Universität zu Köln, Zùlpicher Straße 77, 50937 Köln, Germany

\*To whom correspondence should be addressed; E-mail: c.wagner@fz-juelich.de.

# 1 Raw SQDM images

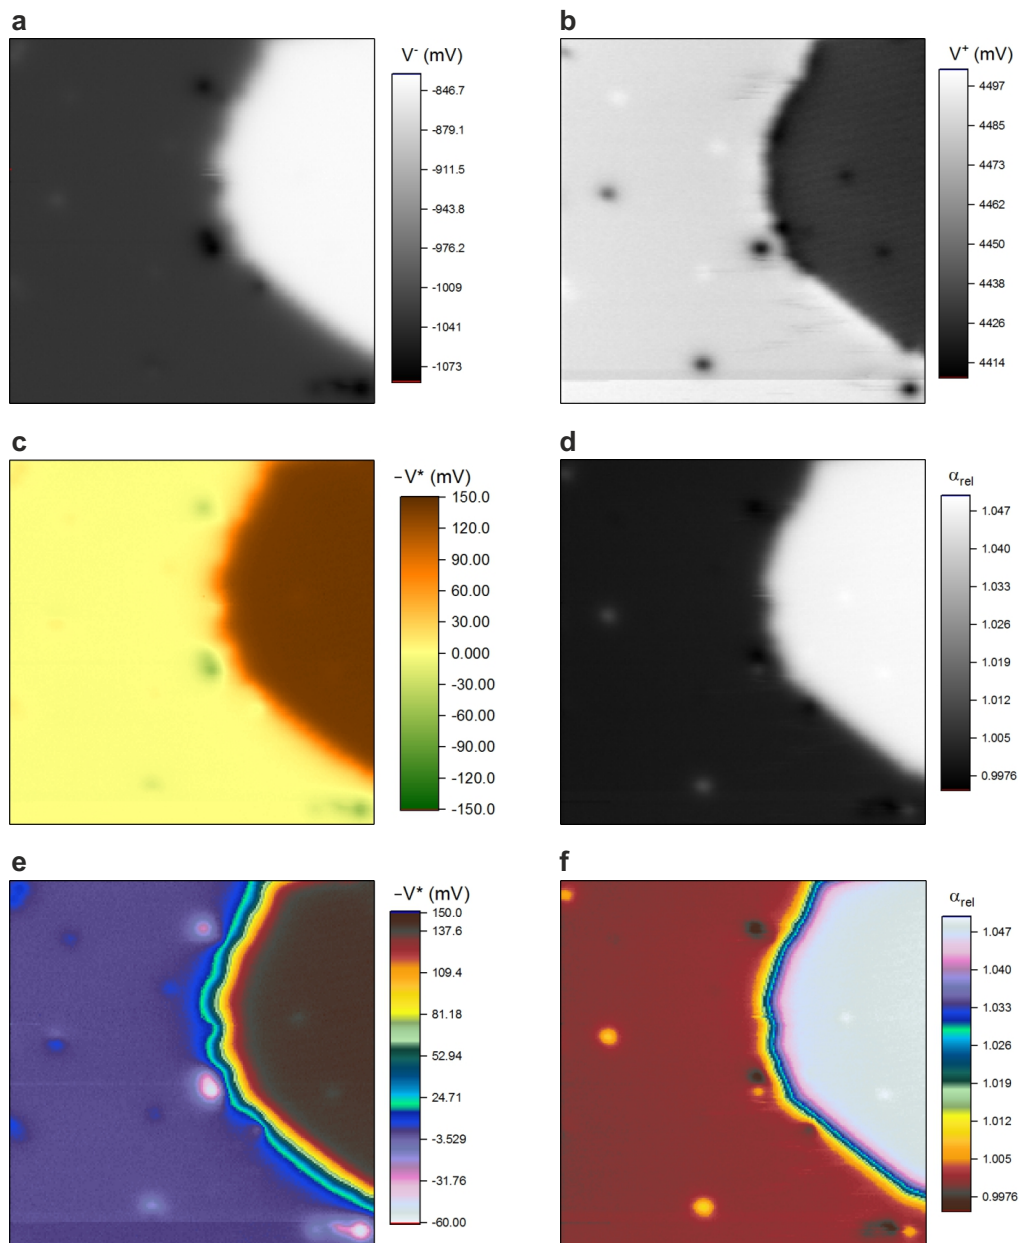

Supplementary Figure 1: **Raw SQDM images.** **a, b** SQDM  $V^+$  and  $V^-$  images as recorded with the slope tracking controller. Forward and backward scan direction have been averaged to optimize the signal-to-noise ratio. **c, d**  $V^*$  and  $\alpha_{rel}$  images as calculated from  $V^+$  and  $V^-$  via Eqs. 5 and 6 of the main paper. **e, f** Same as Panels c and d but with a colour scale that reveals weak contrast variations.

## 2 SQDM on NaCl

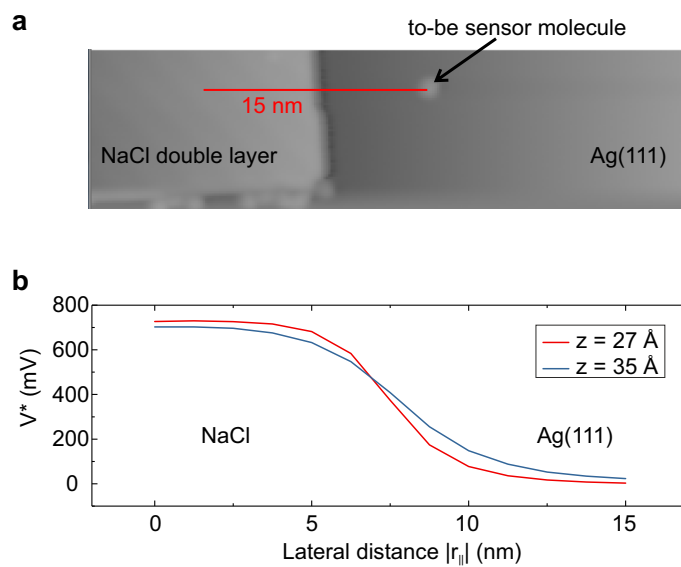

Supplementary Figure 2: **SQDM data for a NaCl bilayer on Ag(111).** **a** STM image of a NaCl island edge and a PTCDA molecule which is subsequently used as quantum dot for SQDM. **b**  $V^*(r_{||})$  profile (location indicated in red in Panel a) across the NaCl island edge recorded at two different tip heights. The work function change of  $-0.73 \text{ eV}$  which we determine from SQDM for the NaCl bilayer on Ag(111) corresponds well to the value of  $-0.63 \text{ eV}$  obtained with KPFM for NaCl on Au(111) [1]. The salt film was prepared by thermal evaporation [2].

## References and Notes

- [1] Loppacher, C., Zerweck, U. & Eng, L. M. Kelvin probe force microscopy of alkali chloride thin films on Au(111). Nanotechnology **15**, S9–S13 (2004). URL [stacks.iop.org/Nano/15/S9](https://stacks.iop.org/Nano/15/S9).
- [2] Repp, J., Meyer, G. & Rieder, K. H. Snell's Law for Surface Electrons: Refraction of an Electron Gas Imaged in Real Space. Physical Review Letters **92**, 036803 (2004). URL <https://journals.aps.org/prl/abstract/10.1103/PhysRevLett.92.036803>. 0311415.
